# Supplementary material for: A general strategy for synthesis of cyclophane-braced peptide macrocycles via palladium-catalysed intramolecular sp3 C−H arylation
Source: Springer Nature journal article supplement (doi:10.1038/s41557-018-0006-y), 2018-03-29
Supplement: 41557_2018_6_MOESM160_ESM.mol [file 41557_2018_6_MOESM160_ESM.mol]

nchem.17010040B-comp29.mol
  ChemDraw01101811142D

 34 37  0  0  1  0  0  0  0  0999 V2000
   -2.3015   -1.2510    0.0000 C   0  0  0  0  0  0  0  0  0  0  0  0
   -1.4135   -1.2367    0.0000 C   0  0  0  0  0  0  0  0  0  0  0  0
   -3.5285   -1.2032    0.0000 C   0  0  0  0  0  0  0  0  0  0  0  0
   -2.6525   -1.9525    0.0000 C   0  0  0  0  0  0  0  0  0  0  0  0
   -1.5662   -1.9671    0.0000 C   0  0  0  0  0  0  0  0  0  0  0  0
   -0.3727   -1.0887    0.0000 C   0  0  0  0  0  0  0  0  0  0  0  0
    0.2432   -0.3725    0.0000 C   0  0  0  0  0  0  0  0  0  0  0  0
   -0.3202    0.3914    0.0000 C   0  0  0  0  0  0  0  0  0  0  0  0
   -4.0281   -0.4565    0.0000 C   0  0  0  0  0  0  0  0  0  0  0  0
   -3.9708    0.2539    0.0000 C   0  0  0  0  0  0  0  0  0  0  0  0
   -3.1179    0.4964    0.0000 N   0  0  0  0  0  0  0  0  0  0  0  0
   -2.5259    1.3653    0.0000 C   0  0  0  0  0  0  0  0  0  0  0  0
   -1.6092    1.1075    0.0000 C   0  0  0  0  0  0  0  0  0  0  0  0
   -2.9384    2.0798    0.0000 O   0  0  0  0  0  0  0  0  0  0  0  0
    1.0723   -0.8423    0.0000 C   0  0  0  0  0  0  0  0  0  0  0  0
    1.8249   -0.4298    0.0000 C   0  0  0  0  0  0  0  0  0  0  0  0
    1.8249    0.3952    0.0000 O   0  0  0  0  0  0  0  0  0  0  0  0
    2.5394   -0.8423    0.0000 N   0  0  0  0  0  0  0  0  0  0  0  0
   -0.9234    1.5200    0.0000 C   0  0  0  0  0  0  0  0  0  0  0  0
   -0.0623    1.0789    0.0000 C   0  0  0  0  0  0  0  0  0  0  0  0
    3.2539   -0.4298    0.0000 C   0  0  0  0  0  0  0  0  0  0  0  0
    3.9683   -0.8423    0.0000 C   0  0  0  0  0  0  0  0  0  0  0  0
    4.6828   -0.4298    0.0000 C   0  0  0  0  0  0  0  0  0  0  0  0
    4.6828    0.3952    0.0000 C   0  0  0  0  0  0  0  0  0  0  0  0
    3.9683    0.8077    0.0000 C   0  0  0  0  0  0  0  0  0  0  0  0
    3.2539    0.3952    0.0000 C   0  0  0  0  0  0  0  0  0  0  0  0
    3.9683   -1.6673    0.0000 N   0  0  0  0  0  0  0  0  0  0  0  0
    4.6828   -2.0798    0.0000 C   0  0  0  0  0  0  0  0  0  0  0  0
    5.3973   -1.6673    0.0000 C   0  0  0  0  0  0  0  0  0  0  0  0
    5.3973   -0.8423    0.0000 C   0  0  0  0  0  0  0  0  0  0  0  0
   -4.6853    0.6664    0.0000 C   0  0  0  0  0  0  0  0  0  0  0  0
   -5.3973    0.2553    0.0000 O   0  0  0  0  0  0  0  0  0  0  0  0
   -4.6853    1.4885    0.0000 O   0  0  0  0  0  0  0  0  0  0  0  0
   -5.3973    1.8996    0.0000 C   0  0  0  0  0  0  0  0  0  0  0  0
 33 34  1  0      
 31 32  2  0      
 31 33  1  0      
 10 31  1  1      
  1  2  2  0      
  1  3  1  0      
  3  4  2  0      
  4  5  1  0      
  2  6  1  0      
  6  5  2  0      
  6  7  1  0      
  7  8  1  0      
  9 10  1  0      
 10 11  1  0      
 11 12  1  0      
 12 13  1  0      
 12 14  2  0      
  9  3  1  0      
  7 15  1  0      
 15 16  1  0      
 16 17  2  0      
 16 18  1  0      
 13 19  1  0      
 19 20  1  0      
 20  8  1  0      
 18 21  1  0      
 21 22  2  0      
 22 23  1  0      
 23 24  2  0      
 24 25  1  0      
 25 26  2  0      
 26 21  1  0      
 22 27  1  0      
 27 28  2  0      
 28 29  1  0      
 29 30  2  0      
 30 23  1  0      
M  STY  1   1 SUP
M  SLB  1   1   1
M  SAL   1  4  31  32  33  34
M  SBL   1  1   4
M  SMT   1 ^CO2Me
M  SBV   1   4    0.7145   -0.4125
M  END
